# Supplementary material for: The Flagellar Transcriptional Regulator FtcR Controls Brucella melitensis 16M Biofilm Formation via a betI-Mediated Pathway in Response to Hyperosmotic Stress
Source: MDPI journal article supplement (doi:10.3390/ijms23179905), 2022-08-31
Supplement: s1 [file s1]

## Supplementary material

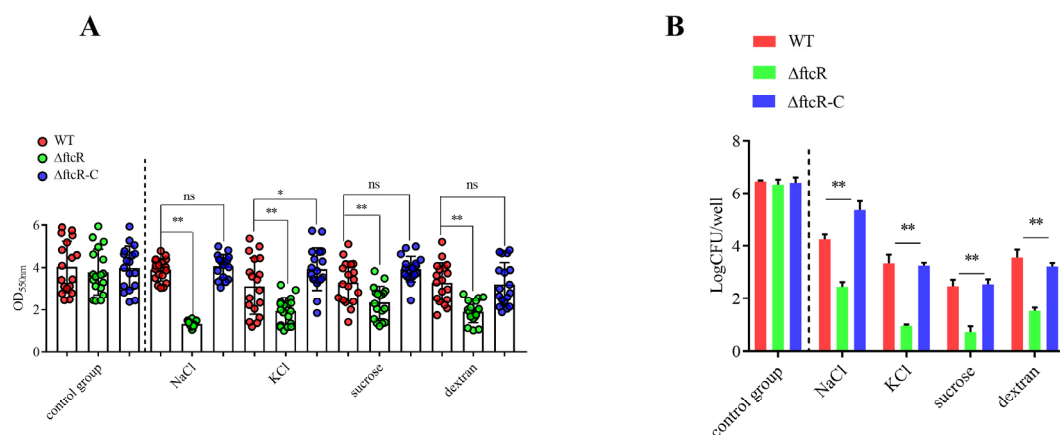

**Supplementary Figure S1.** Biofilm resistance of  $\Delta ftcR$  in response to different osmotic solutes. (A) The biofilms of WT,  $\Delta ftcR$ , and  $\Delta ftcR-C$  were treated with different osmotic solutes for 20 d and their biomass was quantified using a crystal violet (CV) assay. Each point represents an independent well. (B) Survival of WT and  $\Delta ftcR$  cells in biofilms grown under different osmotic solutes. Error bars represent standard error ( $n \geq 3$ ). \*  $p \leq 0.05$ , \*\*  $p \leq 0.01$ , unpaired Student's  $t$ -test. ns, not significant.

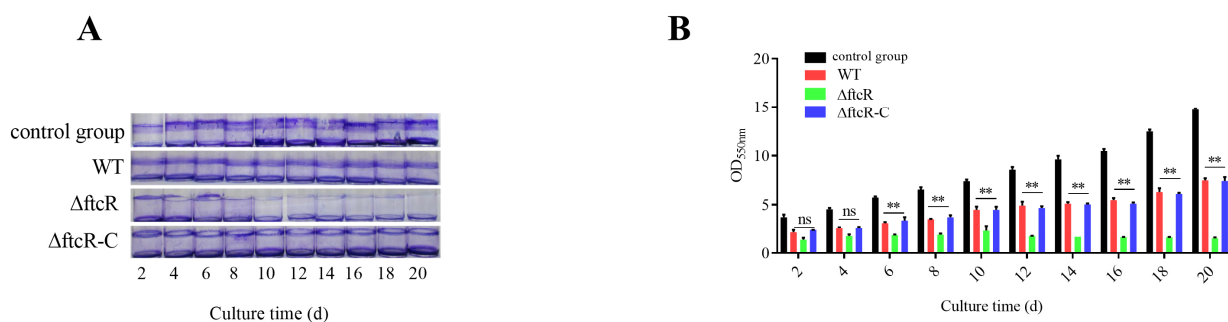

**Supplementary Figure S2.** Quantitative analysis of the biofilm using CV staining and bacterial plate count. (A) The biofilm of the WT,  $\Delta ftcR$ , and  $\Delta ftcR-C$  strains under hyperosmotic stress and quantified with 0.1% CV. (B) Survival of WT,  $\Delta ftcR$ , and  $\Delta ftcR-C$  strains in biofilms grown under hyperosmotic stress. Error bars represent standard error ( $n \geq 3$ ). \*\*  $p \leq 0.01$ , unpaired Student's  $t$ -test. ns, not significant.

**A**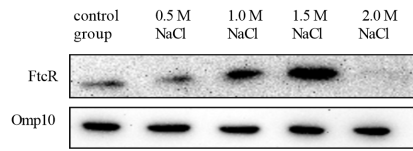**B**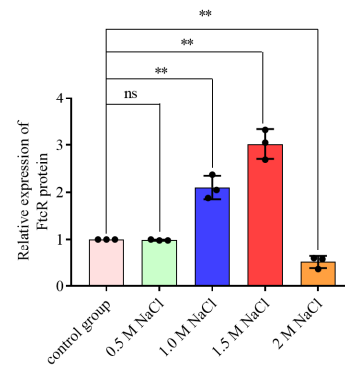

**Supplementary Figure S3.** FtcR protein expression in biofilm under hyperosmotic stress conditions. **(A)** Expression of FtcR in biofilm cells after NaCl treatment was detected by western blotting. **(B)** Protein expression was evaluated by measuring the mean gray values of western blots using ImageJ. Error bars represent standard error ( $n \geq 3$ ).  $**p \leq 0.01$ , unpaired Student's *t*-test. ns, not significant.



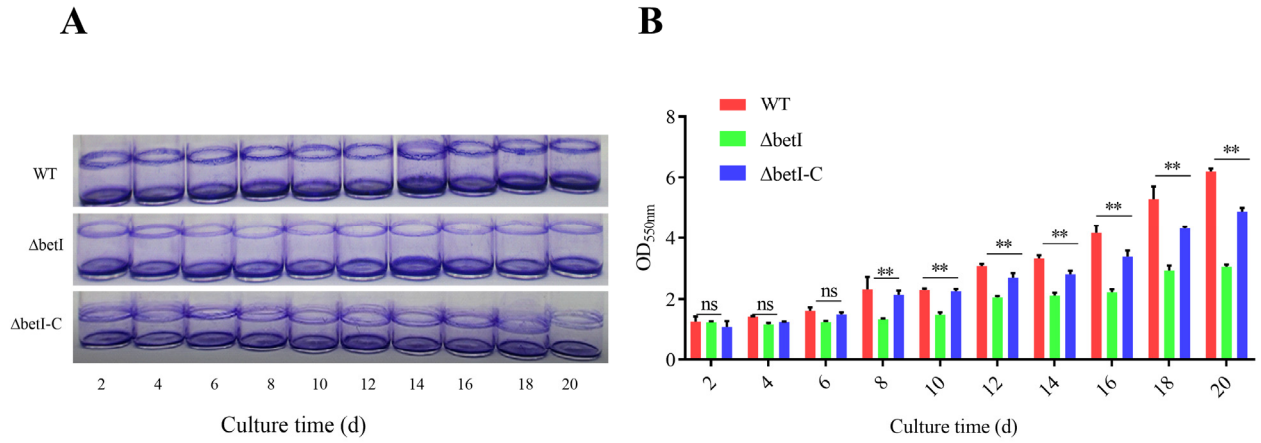

**Figure S5.** Quantitative analysis of the biofilm using CV staining and bacterial plate count. **(A)** The biofilm of WT,  $\Delta betI$ , and  $\Delta betI-C$  strains under hyperosmotic stress and quantified with 0.1% CV. **(B)** Survival of WT,  $\Delta betI$ , and  $\Delta betI-C$  strains in biofilms grown under hyperosmotic stress. Error bars represent standard error ( $n \geq 3$ ).  $**p \leq 0.01$ , unpaired Student's  $t$ -test. ns, not significant.

**Table S1 FtcR binding sites identified by ChIP-Seq and RNA-Seq.**

| Chromosom <sup>a</sup>         | Peak start (bp) | Peak stop <sup>a</sup> (bp) | ChIP fold enrichment | Downstream gene <sup>b</sup> |             |                                                     | Biofilm transcript log2         |
|--------------------------------|-----------------|-----------------------------|----------------------|------------------------------|-------------|-----------------------------------------------------|---------------------------------|
|                                |                 |                             | (IP/Input)           |                              |             |                                                     | fold Change ( $\Delta$ ftcR/WT) |
|                                |                 |                             |                      | ID <sup>c</sup>              | Name        | Product annotation                                  |                                 |
| Transport and binding proteins |                 |                             |                      |                              |             |                                                     |                                 |
| NC_003317.1                    | 159,616         | 162,822                     | 20.41                | BME_RS00790                  | amtB        | ammonium transporter                                | -1.95                           |
| NC_003317.1                    | 1,431,703       | 1,432,149                   | 4.74                 | BME_RS06945                  | betI        | transcriptional regulator BetI                      | -2.29                           |
| NC_003317.1                    | 165,608         | 169,298                     | 1.70                 | BME_RS00805                  | BME_RS00805 | DMT family transporter                              | -1.3                            |
| NC_003317.1                    | 1,462,803       | 1,463,632                   | 1.48                 | BME_RS07095                  | BME_RS07095 | ABC transporter permease                            | 1.82                            |
| NC_003317.1                    | 1,405,154       | 1,405,417                   | 1.45                 | BME_RS06800                  | BME_RS06800 | penicillin-binding protein 1A                       | -1.52                           |
| NC_003317.1                    | 1,418,321       | 1,418,648                   | 1.37                 | BME_RS06870                  | BME_RS06870 | S9 family peptidase                                 | 1.91                            |
| NC_003317.1                    | 1,989,144       | 1,989,754                   | 1.40                 | BME_RS09570                  | BME_RS09570 | extracellular solute-binding protein                | 1.19                            |
| NC_003317.1                    | 466,058         | 466,440                     | 1.32                 | BME_RS02235                  | BME_RS02235 | Lrp/AsnC ligand binding domain-containing protein   | 1.41                            |
| NC_003318.1                    | 950,346         | 950,574                     | 1.30                 | BME_RS14635                  | BME_RS14635 | amino acid permease                                 | 1.97                            |
| NC_003317.1                    | 1,122,809       | 1,123,018                   | 1.14                 | BME_RS05400                  | BME_RS05400 | ATP-binding protein                                 | 1.26                            |
| NC_003318.1                    | 563,019         | 563,278                     | 1.27                 | BME_RS12810                  | BME_RS12810 | ABC transporter ATP-binding protein                 | -1.15                           |
| NC_003317.1                    | 1,598,343       | 1,598,611                   | 1.25                 | BME_RS07740                  | sbmA        | peptide antibiotic transporter SbmA                 | 1.18                            |
| NC_003317.1                    | 278,153         | 278,501                     | 1.21                 | BME_RS01300                  | BME_RS01300 | MFS transporter                                     | 1.11                            |
| Regulatory functions           |                 |                             |                      |                              |             |                                                     |                                 |
| NC_003317.1                    | 170,084         | 170,669                     | 3.17                 | BME_RS10945                  | ftcR        | response regulator transcription factor             | -1.80                           |
| NC_003317.1                    | 2,030,864       | 2,031,583                   | 1.53                 | BME_RS09760                  | BME_RS09760 | helix-turn-helix domain-containing protein          | 1.13                            |
| NC_003317.1                    | 1,275,020       | 1,275,763                   | 1.52                 | BME_RS06170                  | BME_RS06170 | helix-turn-helix domain-containing protein          | 1.13                            |
| NC_003318.1                    | 840,458         | 840,828                     | 1.29                 | BME_RS14130                  | BME_RS14130 | CerR family C-terminal domain-containing protein    | -2.09                           |
| NC_003318.1                    | 676,928         | 677,262                     | 1.25                 | BME_RS13320                  | BME_RS13320 | IclR family transcriptional regulator               | -1.58                           |
| NC_003318.1                    | 439,149         | 439,520                     | 1.38                 | BME_RS12245                  | BME_RS12245 | IMPACT family protein                               | -1.22                           |
| NC_003317.1                    | 1,731,455       | 1,731,741                   | 1.21                 | BME_RS08395                  | BME_RS08395 | SANT/Myb-like DNA-binding domain-containing protein | -1.07                           |
| Cell envelope                  |                 |                             |                      |                              |             |                                                     |                                 |

|                                        |           |           |      |             |             |                                                                      |       |
|----------------------------------------|-----------|-----------|------|-------------|-------------|----------------------------------------------------------------------|-------|
| NC_003317.1                            | 976,229   | 977,214   | 1.80 | BME_RS04695 | mscS        | Small-conductance mechanosensitive channel                           | 1.45  |
| NC_003318.1                            | 161,916   | 162,299   | 1.42 | BME_RS10900 | BME_RS10900 | autotransporter outer membrane beta-barrel domain-containing protein | -1.32 |
| NC_003317.1                            | 609,170   | 609,467   | 1.30 | BME_RS02920 | bamD        | outer membrane protein assembly factor                               | 1.21  |
| Translation                            |           |           |      |             |             |                                                                      |       |
| NC_003317.1                            | 1235      | 2280      | 1.63 | BME_RS00020 | rhO         | transcription termination factor                                     | 1.38  |
| NC_003317.1                            | 796,452   | 796,668   | 1.25 | BME_RS03875 | rplO        | 50s ribosomal protein L15                                            | 1.61  |
| Hypothetical proteins                  |           |           |      |             |             |                                                                      |       |
| NC_003317.1                            | 562,645   | 562,929   | 1.27 | BME_RS02710 | BME_RS02710 | hypothetical protein                                                 | 1.35  |
| NC_003317.1                            | 1,464,965 | 1,465,199 | 1.25 | BME_RS07105 | BME_RS07105 | hypothetical protein                                                 | 1.57  |
| NC_003317.1                            | 736,280   | 736,631   | 1.62 | BME_RS03530 | BME_RS03530 | hypothetical protein                                                 | -1.39 |
| NC_003317.1                            | 1,014,836 | 1,015,571 | 1.29 | BME_RS04850 | BME_RS04850 | DUF2059 domain-containing protein                                    | 1.40  |
| NC_003317.1                            | 1,263,340 | 1,263,620 | 1.50 | BME_RS06115 | BME_RS06115 | SH3 domain-containing protein                                        | -1.07 |
| NC_003318.1                            | 309,516   | 309,817   | 1.39 | BME_RS11645 | BME_RS11645 | hypothetical protein                                                 | -1.23 |
| NC_003317.1                            | 540,668   | 540,910   | 1.36 | BME_RS16045 | BME_RS16045 | hypothetical protein                                                 | 2.08  |
| NC_003317.1                            | 1,359,006 | 1,359,221 | 1.23 | BME_RS06590 | BME_RS06590 | DUF423 domain-containing protein                                     | -2.08 |
| NC_003318.1                            | 782,398   | 782,682   | 1.31 | BME_RS03750 | BME_RS03750 | hypothetical protein                                                 | 1.36  |
| Fatty acid and phospholipid metabolism |           |           |      |             |             |                                                                      |       |
| NC_003317.1                            | 929,833   | 930,378   | 1.56 | BME_RS04465 | BME_RS04465 | acyl-CoA dehydrogenase                                               | 1.17  |
| NC_003318.1                            | 849,100   | 849,440   | 1.52 | BME_RS14185 | BME_RS14185 | acyl-CoA synthetase                                                  | -1.26 |
| NC_003317.1                            | 826,002   | 826,710   | 1.29 | BME_RS03995 | BME_RS03995 | acyl-CoA carboxylase subunit beta                                    | 1.02  |
| NC_003318.1                            | 126,309   | 126,561   | 1.24 | BME_RS10785 | BME_RS10785 | amidohydrolase                                                       | -1.62 |
| Cellular processes                     |           |           |      |             |             |                                                                      |       |
| NC_003317.1                            | 1,121,712 | 1,122,020 | 1.29 | BME_RS05390 | secDF       | protein translocase subunit SecDF                                    | 1.36  |
| NC_003318.1                            | 363,874   | 364,095   | 1.26 | BME_RS11895 | BME_RS11895 | D-aminopeptidase                                                     | -1.8  |
| NC_003317.1                            | 521,102   | 521,437   | 1.44 | BME_RS02510 | BME_RS02510 | lytic transglycosylase domain-containing protein                     | -1.13 |
| NC_003317.1                            | 1,034,504 | 1,034,944 | 1.30 | BME_RS04940 | BME_RS04940 | septal ring lytic transglycosylase RlpA family protein               | 1.15  |
| NC_003317.1                            | 1,093,915 | 1,094,349 | 1.32 | BME_RS05270 | prfB        | peptide chain release factor 2                                       | 1.80  |
| NC_003318.1                            | 29,861    | 30,171    | 1.24 | BME_RS10340 | BME_RS10340 | type IV secretion system protein                                     | -2.51 |

|                   |           |           |      |             |             |                                                                          |       |
|-------------------|-----------|-----------|------|-------------|-------------|--------------------------------------------------------------------------|-------|
| NC_003317.1       | 2,033,625 | 2,033,923 | 1.23 | BME_RS09770 | BME_RS09770 | hemolysin family protein                                                 | 1.17  |
| NC_003317.1       | 1,674,958 | 1,675,197 | 1.25 | BME_RS08095 | BME_RS08095 | glycosyltransferase                                                      | -1.27 |
| NC_003317.1       | 1,462,130 | 1,462,520 | 1.25 | BME_RS07090 | BME_RS07090 | DegT/DnrJ/EryC1/StrS aminotransferase family protein                     | 1.78  |
| NC_003317.1       | 1,009,588 | 1,010,451 | 1.24 | BME_RS04825 | gltX        | glutamate-tRNA ligase                                                    | 1.06  |
| NC_003317.1       | 1,027,230 | 1,027,614 | 1.23 | BME_RS04910 | BME_RS04910 | MBL fold metallo-hydrolase                                               | 1.30  |
| NC_003318.1       | 716,427   | 716,639   | 1.31 | BME_RS13530 | BME_RS13530 | BA14K family protein                                                     | -1.09 |
| NC_003317.1       | 555,294   | 557,788   | 1.82 | BME_RS02665 | BME_RS02665 | YcgN family cysteine cluster protein                                     | 1.49  |
| NC_003317.1       | 1,345,304 | 1,345,620 | 1.43 | BME_RS06525 | BME_RS06525 | NYN domain-containing protein                                            | 1.28  |
| Energy metabolism |           |           |      |             |             |                                                                          |       |
| NC_003317.1       | 1,451,282 | 1,451,487 | 1.14 | BME_RS07020 | BME_RS07020 | mannose-1-phosphate<br>guanylyltransferase/mannose-6-phosphate isomerase | 1.26  |
| NC_003318.1       | 367,936   | 368,158   | 1.29 | BME_RS11925 | BME_RS11925 | Gfo/Idh/MocA family oxidoreductase                                       | -1.62 |

<sup>a</sup>ChIP-Seq peaks of FtcR distributed across the *Brucella melitensis* 16M genome in chromosomes I and II.

<sup>b</sup>Lists the gene located downstream from the target site and whether the gene is changed in the transcriptome.

<sup>c</sup>ID, identifier.

**Table S2. Primers of mutants and complementation used for this work.**

| Primer        | Sequence                                   |
|---------------|--------------------------------------------|
| ftcR-N-F      | GCCGAGCCTGAATGTGGAC                        |
| ftcR-N-R      | GACATTCATCCCAGGTGGCCGGCCCCGCCTTCC          |
| ftcR-C-F      | TCTGGGGTTCGAAATGACCGTATTGATGTTTTCCCGCAAGTC |
| ftcR-C-R      | GGGCAGGACAAGCGAGG                          |
| kan-F         | GCCACCTGGGATGAATGTC                        |
| kan-R         | CGGTCATTTTGAACCCAGCA                       |
| fliF-N-F      | CTGACACTGATGCGAAGA                         |
| fliF-N-R      | GACATTCATCCCAGGTGGCCCTGTTGAACGCAAGCTA      |
| fliF-C-F      | TCTGGGGTTCGAAATGACCGGAATGAGCGCGCTTT        |
| fliF-C-R      | ATGGGCCTGCAATGC                            |
| betI-N-F      | CTTTGGGCAAGCTTTACC                         |
| betI-N-R      | GACATTCATCCCAGGTGGCGATATTCATCCGGTTGTCTG    |
| betI-C-F      | TCTGGGGTTCGAAATGACCGCATGGAAGCAGATTTTCG     |
| betI-C-R      | GGCATGGAACAGCGGATTG                        |
| ftcR-F-C      | AAGCTTGGATGATTGTTGTCGT                     |
| ftcR-R-C      | GAATTCGGTCACTCGATATTGA                     |
| betI-F-C      | CGTCGACTGCCCAAGATCGGGA                     |
| betI-R-C      | TGAATTCTCAATTCTCCGCCGAA                    |
| p2c2Xamont    | ATATCTAGATTCAGCCGCGGCGGGCT                 |
| p2c2Baval     | ATTGGATCCCCTTCGCGACCGAACCA                 |
| Biotin-ftcR-F | GACGGCAGCGGGCAAAAGCC                       |
| Biotin-ftcR-R | TTCTGCTGCCGCCTTATCAA                       |
| Mut-ftcR-F    | GACGGCTGTCCTTGAAAGCC                       |
| Mut-ftcR-R    | TTCTGCTGCCGCCTTATCAA                       |
| Biotin-betI-F | TGCCTGCCGCTTTGGGCAAG                       |
| Biotin-betI-R | TGTTTTTTCGCTGGGCGACATAGAA                  |
| Mut-betI-F    | TGCCTGCCGCTGTCCTTGAG                       |
| Mut-betI-R    | TGTTTTTTCGCTGGGCGACATAGAA                  |



**Table S3. Primers of qRT-PCR used for this work.**

| Primer        | Sequence             |
|---------------|----------------------|
| 16S rRNA-F    | ACTAAGGGCGAGGGTTGC   |
| 16S rRNA-R    | CACTGGACCATTACTGACGC |
| amtB-F        | AGCCTGCCCCGACTTT     |
| amtB-R        | TCTTGCGCACCATGCC     |
| betI-F        | TGCCATCCGCACCATC     |
| betI-R        | GTTTGATCGCCGCGTT     |
| BME_RS00805-F | GGGTGCTGATCTTTTCCGGG |
| BME_RS00805-R | CGACAACCAGTGAAACAGCA |
| BME_RS07095-F | TGGAAGGTACGCCACTTC   |
| BME_RS07095-R | ATATAGGGGGCATATGCA   |
| BME_RS06800-F | GGCAGAAAAAGATCGCGG   |
| BME_RS06800-R | GCCGGGAGAAAATCGTGA   |
| BME_RS06870-F | ACCATGGCCGACCTTGAA   |
| BME_RS06870-R | CCCACACCGAGGAAAAAG   |
| BME_RS09570-F | GGTGGCCATGCTTGCAAG   |
| BME_RS09570-R | TTGAGGTGTGCGAAAGTGCC |
| BME_RS02235-F | TCGCAGACGGCCACC      |
| BME_RS02235-R | GGCGTCGTGCGGTCA      |
| BME_RS14635-F | ATGACAACACCAACCGCA   |
| BME_RS14635-R | GAAAGAAAACGGCTGCAA   |
| BME_RS05400-F | TGGACCGTTTGATAGCCG   |
| BME_RS05400-R | CCAAATCTACGCCACGGA   |
| BME_RS12810-F | CCTGCATGATGTCTCGCT   |
| BME_RS12810-R | GCATTGCCCAGAAGCACT   |
| sbmA-F        | CCCCGTCCGAAACTG      |
| sbmA-R        | GAACACATGCGCGCC      |
| BME_RS01300-F | GATATGGCGCCTGCG      |
| BME_RS01300-R | AGCGAACCGAGACCG      |
